# Supplementary material for: KLF4/MLL3 axis Drives NRBP2 Transcription to Eliminate Acute Myeloid Leukemia Cells
Source: Research Square preprint supplement (doi:10.21203/rs.3.rs-7639334/v1), 2025-09-30
Supplement: Supplementary file 1 [file 4ea7de3c944b73f2041f1bba.xlsx]

## Sheet: list
Supplemental Table 3. Overlapped downregulated genes in OE-KLF4 and OE-NRBP2 RNA-seq
MyList	Gene ID	Gene Symbol
ENSG00000266976	102724908	ERVE-5
ENSG00000155307	64092	SAMSN1
ENSG00000005187	6296	ACSM3
ENSG00000148488	338596	ST8SIA6
ENSG00000181104	2149	F2R
ENSG00000203685	375057	STUM
ENSG00000159164	9900	SV2A
ENSG00000119865	25927	CNRIP1
ENSG00000134954	2113	ETS1
ENSG00000070182	6710	SPTB
ENSG00000164604	54329	GPR85
ENSG00000114805	23007	PLCH1
ENSG00000088305	1789	DNMT3B
ENSG00000152229	9050	PSTPIP2
ENSG00000154310	23043	TNIK
ENSG00000102409	56271	BEX4
ENSG00000104341	55353	LAPTM4B
ENSG00000111554	56890	MDM1
ENSG00000158258	64084	CLSTN2
ENSG00000125257	10257	ABCC4
ENSG00000065675	5588	PRKCQ
ENSG00000158457	340348	TSPAN33
ENSG00000175040	9435	CHST2
ENSG00000157557	2114	ETS2
ENSG00000102287	2564	GABRE
ENSG00000150681	64407	RGS18
ENSG00000144893	116931	MED12L
ENSG00000124406	10396	ATP8A1
ENSG00000141198	10040	TOM1L1
ENSG00000249859	5820	PVT1
ENSG00000174669	3177	SLC29A2
ENSG00000008311	10157	AASS
ENSG00000112655	5754	PTK7
ENSG00000175893	340481	ZDHHC21
ENSG00000047597	7504	XK
ENSG00000114126	7029	TFDP2
ENSG00000071794	6596	HLTF
ENSG00000172159	257019	FRMD3
ENSG00000197555	26037	SIPA1L1
ENSG00000138449	30061	SLC40A1
ENSG00000136014	84101	USP44
ENSG00000145703	10788	IQGAP2
ENSG00000133863	56154	TEX15
ENSG00000165029	19	ABCA1
ENSG00000250420		None
ENSG00000099256	56952	PRTFDC1
ENSG00000119401	22954	TRIM32
ENSG00000152952	5352	PLOD2
ENSG00000145431	56034	PDGFC
ENSG00000022556	55655	NLRP2
ENSG00000106537	27075	TSPAN13
ENSG00000204650	147081	LINC02210
ENSG00000129355	1032	CDKN2D
ENSG00000138795	51176	LEF1
ENSG00000214960	729920	CRPPA
ENSG00000205592	283463	MUC19
ENSG00000062524	4058	LTK
ENSG00000052126	54477	PLEKHA5
ENSG00000081479	4036	LRP2
ENSG00000181690	5324	PLAG1
ENSG00000134508	91768	CABLES1
ENSG00000047648	395	ARHGAP6
ENSG00000067141	4756	NEO1
ENSG00000276256		None
ENSG00000183098	10082	GPC6
ENSG00000158714	56833	SLAMF8
ENSG00000148200	2649	NR6A1
ENSG00000179431	24147	FJX1
ENSG00000164684	619279	ZNF704
ENSG00000167695	79850	TLCD3A
ENSG00000185198	400668	PRSS57
ENSG00000181264	219902	TLCD5
ENSG00000165996	9200	HACD1
ENSG00000158966	57685	CACHD1
ENSG00000164989	203238	CCDC171
ENSG00000163710	26577	PCOLCE2
ENSG00000164292	22836	RHOBTB3
ENSG00000279288		None
ENSG00000204934	401431	ATP6V0E2-AS1
ENSG00000075643	55034	MOCOS
ENSG00000272983		None
ENSG00000139263	121227	LRIG3
ENSG00000149534	2206	MS4A2
ENSG00000170293	152189	CMTM8
ENSG00000240445	2310	FOXO3B
ENSG00000163072	115677	NOSTRIN
ENSG00000205572	728492	SERF1B
ENSG00000196159	79633	FAT4
ENSG00000160201	7307	U2AF1
ENSG00000118156	84215	ZNF541
ENSG00000264885		None
ENSG00000148219	23245	ASTN2
ENSG00000254838	387751	GVINP1
ENSG00000235169	388588	SMIM1
ENSG00000187037	353345	GPR141
ENSG00000256229	90649	ZNF486
ENSG00000200087	26768	SNORA73B
ENSG00000147234	84443	FRMPD3
ENSG00000101230	140862	ISM1
ENSG00000100625	51804	SIX4
ENSG00000100206	11144	DMC1
ENSG00000137959	10964	IFI44L
ENSG00000180815	389840	MAP3K15
ENSG00000114698	57088	PLSCR4
ENSG00000279673		None
ENSG00000114487	27136	MORC1
ENSG00000086288	51314	NME8
ENSG00000151575	374618	TEX9
ENSG00000261787	100129654	TCF24
ENSG00000091428	11069	RAPGEF4
