# Supplementary material for: KLF4/MLL3 axis Drives NRBP2 Transcription to Eliminate Acute Myeloid Leukemia Cells
Source: Research Square preprint supplement (doi:10.21203/rs.3.rs-7639334/v1), 2025-09-30
Supplement: Supplementary file 3 [file b84f5b63e5b366e909944e37.xlsx]

## Sheet: Antibodies and Reagents
Supplemental Table 1: Antibodies and Reagents
Product	Company	Cat#
KLF4	abcam	ab215036
VeriBlot for IP Detection(HRP)	abcam	ab131366
IgG H&L (Alexa Fluor® 647)	abcam	ab150075
β-actin	abclonal	AC028
Goat ANTI-RABIT IgG(H+L)	abclonal	AS070
HRP-conjugated Goat anti-Mouse IgG (H+L)	abclonal	AS003
MLL3 (D1S1V) Rabbit mAb	CST	53641S
RBBP5 (D3I6P) Rabbit mAb	CST	13171S
WDR5 (D9E1I) Rabbit mAb #13105	CST	13105S
ASH2L (D93F6) XP® Rabbit mAb	CST	#5019
Rabbit (DA1E) mAb IgG XP® Isotype Control	CST	3900S
Mouse (G3A1) mAb IgG1 Isotype Control	CST	5415S
TNIK Antibody #32712	CST	32712
Goat anti-Mouse IgG (H+L) Highly Cross-Adsorbed Secondary Antibody, Alexa Fluor™ Plus 555	Invitrogen	A32727
NRBP2 Polyclonal Antibody	proteintech	1549-1-AP
FLAG	Sigma	F1804
TNIK-IN-1	MCE	HY-124762
pAG-Tn5 Transposome	abclonal	RK20264
TRIzol reagent	ambion	15596018
10X Annexin V Binding Buffer	BD	556454
APC Annexin V	BioLegend	640920
Cell Counting Kit-8(CCK8)	CK04	Dojindo
EndoFree Plasmid Midi Kit	CWBIO	CW2105
RPMI1640	Gibco	A10491-01
IMDM	Gibco	C12440500BT
DMEM	Gibco	C11995500BT
L-Glutamine	Gibco	A2916801
CD117 (cKit) MicroBeads	Miltenyi Biotec	130-091-224
Recombinant murine SCF	PeproTech	250-03
recombinant murine TPO	PeproTech	315-14
recombinant murine IL-3	PeproTech	213-13
recombinant murine IL-6	PeproTech	216-16
human IL-6	PeproTech	200-06
human TPO	PeproTech	300-18
human SCF	PeproTech	300-07
Dual-Luciferase® Reporter Assay System	Promega	E1910
Protease inhibitor Coctail	Roche	4693132001
doxycycline	Sigma	D9891
DAPI	Sigma	D9542-5MG
StemSpan SFEM	STEMCELL	#09650
MethoCult™ M3231	STEMCELL	03231
MethoCult™ H4100	STEMCELL	04100
RetroNectin	TAKARA	T100B
Protein G magnetic beads	Thermo Scientific	10004D
Lipofectamine™ 2000 Transfection Reagent	Thermo Scientific	11668019
lipofectamineRNAiMAX	Thermo Scientific	13778-150
TransScript® II First-Strand cDNA Synthesis SuperMix	TRAN	AT341-02
VAHTS DNA Clean Beads	Vazyme	N411-01
VAHTS Concanavalin A-coated Magnetic Beads Pro	Vazyme	N515-01
Hyperactive ATAC-Seq Library Prep Kit for Illumina	Vazyme	TD711-01
TruePrep DNA Library Prep Kit V2 for Illumina	Vazyme	TD501
Hieff UNICON® Universal Blue qPCR SYBR Green Master Mix	Yeasen	11184ES03
