# Supplementary material for: KLF4/MLL3 axis Drives NRBP2 Transcription to Eliminate Acute Myeloid Leukemia Cells
Source: Research Square preprint supplement (doi:10.21203/rs.3.rs-7639334/v1), 2025-09-30
Supplement: Supplementary file 4 [file d20153affbbcd9241fb44b71.xlsx]

## Sheet: Sheet1
Supplemental Table 4: Primers
GENE	Primer-F	Primer-R	Application
human-KLF4	CGGACATCAACGACGTGAG	GACGCCTTCAGCACGAACT	q-PCR
human-NRBP2	GTGGACCACCCGAACATCG	CCTGATGACACGTACTCTGTGAT	q-PCR
human-AASS	CCCACACAATAAAAGCTCAGGA	AAATGCCACTACCCGTACTCC	q-PCR
human-ABCA1	ACCCACCCTATGAACAACATGA	GAGTCGGGTAACGGAAACAGG	q-PCR
human-TNIK	AAGGTAACACGTTGAAAGAGGAG	AGTCAGCAAGACATTTTGCCC	q-PCR
human-GAPDH	GTCTCCTCTGACTTCAACAGCG	ACCACCCTGTTGCTGTAGCCAA	q-PCR
mouse-GAPDH	CATCACTGCCACCCAGAAGACTG	ATGCCAGTGAGCTTCCCGTTCAG	q-PCR
mouse-EVPL	CCCCCAACAAGCACAATCG	CTGCGTCTCCAAAATGTCTCTT	q-PCR
mouse-NLRC3	CAGATTGGTAACAAAGGAGCCA	CGTTCGGTTTATCTTCAGAGCA	q-PCR
mouse-KLF3	GAAGCCCAACAAATATGGGGT	GGACGGGAACTTCAGAGAGG	q-PCR
mouse-GRHL3	TGAGAGCATTCATGGGGTTCC	CCGGGGATGTCTTCAGAATATCA	q-PCR
human-NRBP2-ChIP	CACAGACATTCAAATCAGGCA	GTGTTCAAATCCTCCACCC	ChIP-q-PCR
