# Supplementary material for: KLF4/MLL3 axis Drives NRBP2 Transcription to Eliminate Acute Myeloid Leukemia Cells
Source: Research Square preprint supplement (doi:10.21203/rs.3.rs-7639334/v1), 2025-09-30
Supplement: Supplementary file 5 [file d2704341705004a26770744d.docx]

**KLF4/MLL3 axis Drives NRBP2 Transcription to Eliminate Acute Myeloid Leukemia Cells**

Meng Yang1,2#, Cong Chen1,2#, Ting Lu1,2#, Yifei Wang1,2 Yicheng He1,2, Guohuan Sun1,2, Jiaxin Qin1,2, Xiaowei Xie1,2, Jiali Ye1,2,3, Honglin Duan1,2, Chang Xu1,2, Xiangnan Zhao1,2, Biao Zhang1,2, Yapu Li1,2, Fang Dong1,2,Tao Cheng1,2 *, Hui Cheng1,2 *, Shangda Yang1,2*

1State Key Laboratory of Experimental Hematology, National Clinical Research Center for Blood Diseases, Haihe Laboratory of Cell Ecosystem, Institute of Hematology & Blood Diseases Hospital, Chinese Academy of Medical Sciences & Peking Union Medical College, Tianjin 300020, China

2Tianjin Institutes of Health Science, Tianjin 301600, China

3Medical College of Kunming University of Science and Technology

#These authors contributed equally

* Corresponding author:

yangshangda@ihcams.ac.cn; chenghui@ihcams.ac.cn; chengtao@ihcams.ac.cn;

**Supplemental** **Materials and Methods**

**Supplemental Figure Legends**

**Supplemental Materials and Method**

**Leukemia model and transplantation**

c-Kit⁺ cells were enriched from the BM of C57BL/6J mice using c-Kit (CD117) microbeads. Enriched cells were cultured overnight in SFEM medium supplemented with 100 ng/mL murine stem cell factor (mSCF) and 100 ng/mL murine thrombopoietin (mTPO). After 12 hours, cells were transduced with MA9-GFP retrovirus using polybrene (6 µg/mL) in RetroNectin-coated 24-well plates. Following 48 hours of culture, 5 × 10⁵ transduced cells were transplanted via tail vein injection into lethally irradiated (9.5 Gy) recipient mice. When the GFP+ cell percentage in PB reached approximately 95%, the mice were sacrificed, and GFP⁺ MA9 leukemic cells were subsequently isolated from the BM.

For TetO-KLF4 and NRBP2 MA9 cells, the MA9 cells were transduced with overexpression KLF4 and NRBP2 virus and transplanted into C57BL/6J mice. Once the GFP+ cell percentage in PB reached approximately 95%, the mice were sacrificed, and GFP+ MA9 cells were isolated from BM or spleen. Then the MA9 cells were cultured with DOX (2.5 μg/ml) in IMDM with 15% FBS, 50ng/mL mSCF, 10 ng/mL mIL-3 and 10 ng/mL mIL-6.

For TNIK-IN-1 treatment, MA9 cells subcutaneously injected 2 × 10⁵ MA9 cells into C57BL/6J mice for MA9 mice model construction at first. Starting at disease onset by peripheral blood (PB) analysis (~day 14 post-transplantation), mice were treated with TNIK-IN-1 by intraperitoneal injection. TNIK-IN-1 treatment was administered in two cycles separated by a one-week interval, with three consecutive injections per cycle at 24-hour intervals. Vehicle control: 2% DMSO, 40% PEG300, 5% Tween-80, 53% normal saline; TNIK-IN-1: dissolved in control group solution and treatment with 2.5 μg/g.

**Human mononuclear cells (MNC) enrichment**

Human MNC cells were enriched from BM of healthy donors and AML patients. Human samples were collected in EDTA blood tubes and centrifuged at 1500*rpm for 10 min, after which the plasma fraction was discarded. Subsequently, the cell components were subjected to an equal volume of phosphate buffered saline (PBS) buffer and density gradient centrifugation was performed using Ficoll-Paque Plus to isolate mononuclear cells according to the manufacturer's instructions. As a result, MNC were cultured in serum-free expansion medium (SFEM) with human SCF (100 ng/mL), TPO (100 ng/mL), IL-3(20 ng/mL) and IL-6(20 ng/mL).

**Western-Blot**

Western blot was performed as described previously 1. Cellular lysates were prepared in 5× SDS-PAGE loading buffer, denatured by boiling (95°C, 30 min), and resolved by SDS-PAGE. Proteins were subsequently transferred to PVDF membranes and immunoprobed with target-specific primary antibodies followed by species-matched HRP-conjugated secondary antibodies.

**Colony forming assays**

MA9 cells were cultured in M3231 with 50ng/mL mSCF, 10 ng/mL mIL-3 and 10 ng/mL mIL-6 for 10–14 d in 24-well plate. THP-1 cells were cultured in H4100 with 38 mL Iscove's Modified Dulbecco's Medium and 1 mL L-Glutamine for 10-14 days. Finally, colonies were pictured by a high-content analysis system.

**Plasmids and virus**

The flag-plvx-teton-puro vector was used to establish overexpression KLF4 or truncations and NRBP2 plasmids. Next, plasmid DNA was extracted according to EndoFree Plasmid Midi Kit manufacturers. The target plasmids were transfected in 293T cells with pSPAX2 and pMD2G by lipo2000. Supernatants collected at 48h and 72h.

**Luciferase reporter assay**

The functional impact of KLF4 on NRBP2 promoter activity was assessed via dual-luciferase reporter assay. A pGL3-based construct harboring the NRBP2 gene and the KLF4 CRRs were synthesized. Luciferase activity quantification was performed using the Dual-Luciferase® Reporter Assay System (Promega, E1910). Normalized reporter activity was calculated relative to co-transfected Renilla luciferase control and normalized against empty pGL3-Basic vector baseline activity.

**Immunofluorescence**

Cells were washed with PBS and fixed on 4% paraformaldehyde microscope slides. After fixation, they were treated with 0.1% Triton X-100 and incubated with antibody overnight at 4°C. The next day counterstaining was performed in the dark with Rabbit/Mouse Polyclonal Antibody and DAPI. Finally, microscope slides were photographed with confocal after using Antifade Mounting Medium.

**Cell proliferation, viability and apoptosis assay**

Cells were seed in 24-well plate and count by flow cytometer for 5-6 days. Cell viability was measured by Cell Counting Kit-8. Cells were initially seeded in 96-well plates. Then, we add 10μL CCK-8 solution every 24 hours to each well and incubated for an additional 4 h in 37°C. Finally, the plate was measured at 450 nm using a microplate reader.

3×105 cells were seed in per 12-well plates with or without drug for 48h and collect cells washed once with cold PBS, then resuspended in 300 μl of 1 × binding buffer and stained 2 μl APC Annexin V antibody for 15min in room temperature protected from light. After staining, add 1ml PBS to wash cells and resuspend cell 300ul PBS with DAPI (1ug/ml) before flow analysis.

**qRT-PCR**

RNA was extracted with TRIzol reagent. Reverse transcription reactions for cDNA were performed in TransScript® II First-Strand cDNA Synthesis SuperMix. Real-time PCR reactions were used SYBRMaster Mix (Yeasen). Then, Thermo Quant Studio 5 sequence detection system (Thermo) was used to detect transcriptome gene with the expression of GAPDH as the internal control. The primers used are listed in Supplemental Table 4.

**Chromatin Immunoprecipitation Sequencing (ChIP-seq)**

Briefly, 1 × 10⁷ cells underwent crosslinking in 1 % formaldehyde for 10 minutes at room temperature, with quenching achieved by 125 mM glycine incubation for 5 minutes. Fixed cells were resuspended in SDS lysis buffer (1% SDS, 5 mM EDTA, 50 mM Tris-HCl, pH 8.1) containing protease inhibitors. Chromatin fragmentation to ~300 bp fragments was performed using a Bioruptor sonicator (Diagenode). For immunoprecipitation, diluted chromatin aliquots were incubated overnight at 4°C with rotation using either control IgG or target-specific antibodies. Protein G magnetic beads (50 µl of 50% slurry) were subsequently added for 2-hour incubation. Sequential bead washing was performed with: (1) TSE I (0.1% SDS, 1% Triton X-100, 2 mM EDTA, 20 mM Tris-HCl, 150 mM NaCl); (2) TSE II (0.1% SDS, 1% Triton X-100, 2 mM EDTA, 20 mM Tris-HCl); (3) Buffer III (0.25 M LiCl, 1% Nonidet P-40, 1% sodium deoxycholate, 1 mM EDTA, 10 mM Tris-HCl); (4)Tris-EDTA buffer. Crosslink reversal of both immunoprecipitated and input chromatin complexes was achieved by 65°C incubation for 2 hours in elution buffer. Purification of eluted DNA utilized a Qiagen PCR purification kit, followed by analysis via quantitative PCR (qPCR) or high-throughput sequencing (Supplemental Table 4).

In brief, 3 × 10⁵ MA9 cells treated with DOX (0, 6, 12, and 24 h) were lysed in cold hypotonic buffer (10 mM Tris-HCl pH 7.4, 10 mM NaCl, 3 mM MgCl₂, 0.1% Igepal CA-630) for 10 min on ice. Nuclei were pelleted by centrifugation (500 × g, 5 min) and subjected to transposition in 50 μl reaction buffer (Vazyme TD501-01) at 37°C for 30 min. Tagmentation was terminated using VAHTS DNA Clean Beads (Vazyme). Purified DNA underwent library preparation with the TruePrep DNA Library Prep Kit V2 for Illumina Novaseq 6000 platform, followed by paired-end sequencing on the HiSeq X Ten platform. Sequencing reads were aligned to the reference genome using BWA (v0.7.17). Peak calling was performed with MACS2 (v2.2.5; FDR cutoff of 0.05).

**Cleavage under targets and tagmentation (CUT&Tag)**

CUT&Tag experiment in combination with the Hyperactive TM In-Situ ChIP Library Prep Kit for Illumina from Vazyme (TD902-01). Cells were captured using ConA beads and subsequently exposed to primary and secondary antibodies in antibody buffer and dig-wash buffer, respectively, according to the manufacturer's instructions. The cells were then incubated with Hyperactive pA808 Tn5 Transposon and fragmented in Tagmentation Buffer at 37°C for 1 h. The extracted DNA fragments were extracted and subjected to high-throughput sequencing.

Sequencing reads were aligned to the human reference genome (GRCh38/hg38). Subsequent analysis followed established computational pipelines detailed in the CUT&Tag Data Processing and Analysis Protocol (Zheng et al., 2020; Protocol.io). Differential peaks analysis was performed using Diff Bind (v3.10.1) with statistically significant peaks identified at p < 0.05. Genomic annotations of peak regions were generated using ChIPseeker (v1.36.0). Epigenetic modification profiles were visualized across target loci using the Integrative Genomics Viewer (IGV, v2.16.2)2-4.

**RNA-seq and Analysis**

RNA-Seq included two parts of experiment samples. First, MA9 cells overexpressed KLF4 treated with doxycycline (0, 6, 12, and 24 h) from the BM of MA9 mice. Second, THP-1 cells were transfected with KLF4 and NRBP2 overexpression virus. Total RNA was isolated using the AFTMag Quick Viral DNA/RNA Extraction Kit (RK30153). Libraries were prepared using an Illumina RNA library preparation TruSeq PE kit. High-throughput RNA-Seq was performed on an Illumina Xten sequencer (paired-end 150-bp sequencing). Next, all libraries were sequenced on an Illumina Novaseq 6000 platform or Illumina Novaseq X plus using the PE150 strategy.

Raw reads underwent quality control and adapter trimming using Fastp (v0.23.4)5 Clean reads were aligned to reference genomes (mm10 for murine samples; hg38 for human samples) via STAR (v2.7.10b) with ENCODE-standard parameters6. Properly paired, uniquely mapped reads were selected using Samtools (v1.16)7 and read counts were generated with HTSeq (v2.0.2)8. Differential expression analysis was conducted using DESeq2 (v1.38.3) with significance thresholds set at adjusted p-value < 0.05 (Benjamini-Hochberg FDR correction).

**References**

1.Yang S, Liu L, Cao C, Song N, Wang Y, Ma S, Zhang Q, Yu N, Ding X, Yang F, Tian S, Zhang K, Sun T, Yang J, Yao Z, Wu S, Shi L. USP52 acts as a deubiquitinase and promotes histone chaperone ASF1A stabilization. Nat Commun. 2018 Mar 29;9(1):1285.

2. Kaya-Okur HS, Wu SJ, Codomo CA, Pledger ES, Bryson TD, Henikoff JG et al. CUT&Tag for efficient epigenomic profiling of small samples and single cells. Nat Commun. 2019 Apr 29;10(1):1930.

3.Wang Q, Li M, Wu T, Zhan L, Li L, Chen M et al, Exploring Epigenomic Datasets by ChIPseeker. Curr Protoc. 2022 Oct;2(10):e585.

4.Meers MP, Tenenbaum D, Henikoff S. Peak calling by Sparse Enrichment Analysis for CUT&RUN chromatin profiling. Epigenetics Chromatin. 2019 Jul 12;12(1):42.

5.Chen S, Zhou Y, Chen Y, Gu J. fastp: an ultra-fast all-in-one FASTQ preprocessor. Bioinformatics. 2018 Sep 1;34(17):i884-i890.

6.Dobin A, Davis CA, Schlesinger F, Drenkow J, Zaleski C, Jha S et al, STAR: ultrafast universal RNA-seq aligner. Bioinformatics. 2013 Jan 1;29(1):15-21.

7.Danecek P, Bonfield JK, Liddle J, Marshall J, Ohan V, Pollard MO et al, Twelve years of SAMtools and BCFtools. Gigascience. 2021 Feb 16;10(2):giab008.

8.Anders S, Pyl PT, Huber W. HTSeq--a Python framework to work with high-throughput sequencing data. Bioinformatics. 2015 Jan 15;31(2):166-9.

**Supplemental Figure legends**

**Supplemental Fig. 1. KLF4 interacts with MLL3 complex in AML cells.**

(A) The Schematic of Flag-DOX-inducible KLF4 expression systems in THP-1. (B) The colony numbers with or without DOX in THP-1 cells. (C) Colony numbers were analyzed. Data are represented as mean ± SD. ***p* < 0.01, unpaired two-tailed Student’s t test. (D) The expression of KLF4 showed a moderate positive correlation (Pearson) with MLL3 complex members ASH2L, RBBP5, WDR5 and MLL3(KMT2C) in whole blood GTEs database (http://gepia.cancer-pku.cn/).

**Supplemental Fig. 2. KLF4/MLL3 axis promotes NRBP2 transcription in AML cells**

(A) Western blot of KLF4 and NRBP2 in TetO-KLF4-THP1 cells with DOX treatment in 0h,6h,12h,24h,48h. (B) The motif analysis of ChIP-seq at 6h indicated the differential peaks were primarily localized to promoter regions. (C-D) The heatmap of DEGs in RNA-seq (C) and ATAC-seq (D) overexpressed KLF4 at 0, 6, 12, 24h. (E) Western blot of indicate protein expression in control or MLL4 siRNA transfected THP1 cells. (F) qRT-PCR of KLF4 in full length, T2 and T3 truncation cells. Data are represented as mean ± SD. ****p* < 0.001, one-way ANOVA. (G) Western blot of KLF4 and NRBP2 in full length, T2 and T3 truncation cells. (H) IGV software visualization of CUT&Tag results for H3K4me1 and MLL3 in full length, T2, T3 or T6 truncation cells with and without DOX. (I) CUT&Tag results for ASH2L and MLL3 Cut&Tag-seq profile in TSS and TES peak center of full length, T2, T3 or T6 truncation overexpressed cells with DOX.

**Supplemental Fig. 3. TNIK inhibition by TNIK-IN-1 suppresses AML proliferation**

(A)Proliferation assays in THP-1 treated with TNIK-IN-1 at 0-100 μM. (B-E) Proliferation and apoptosis assays in THP-1, MOLM13, HEL, HL-60 and Kasumi cells treated with TNIK-IN-1 at 0, 1, 5, 10 μM. Data are represented as mean ± SD. ****p* < 0.001, one-way ANOVA. (F) Western blots of the expression of TNIK in indicate cells treated with TNIK-IN-1 at 0, 1, 5, 10 μM.
