# Supplementary figures and images for: KLF4/MLL3 axis Drives NRBP2 Transcription to Eliminate Acute Myeloid Leukemia Cells
Source: Research Square preprint supplement (doi:10.21203/rs.3.rs-7639334/v1), 2025-09-30

Supplemental Fig.1 KLF4 interacts with MLL3 complex in AML cells

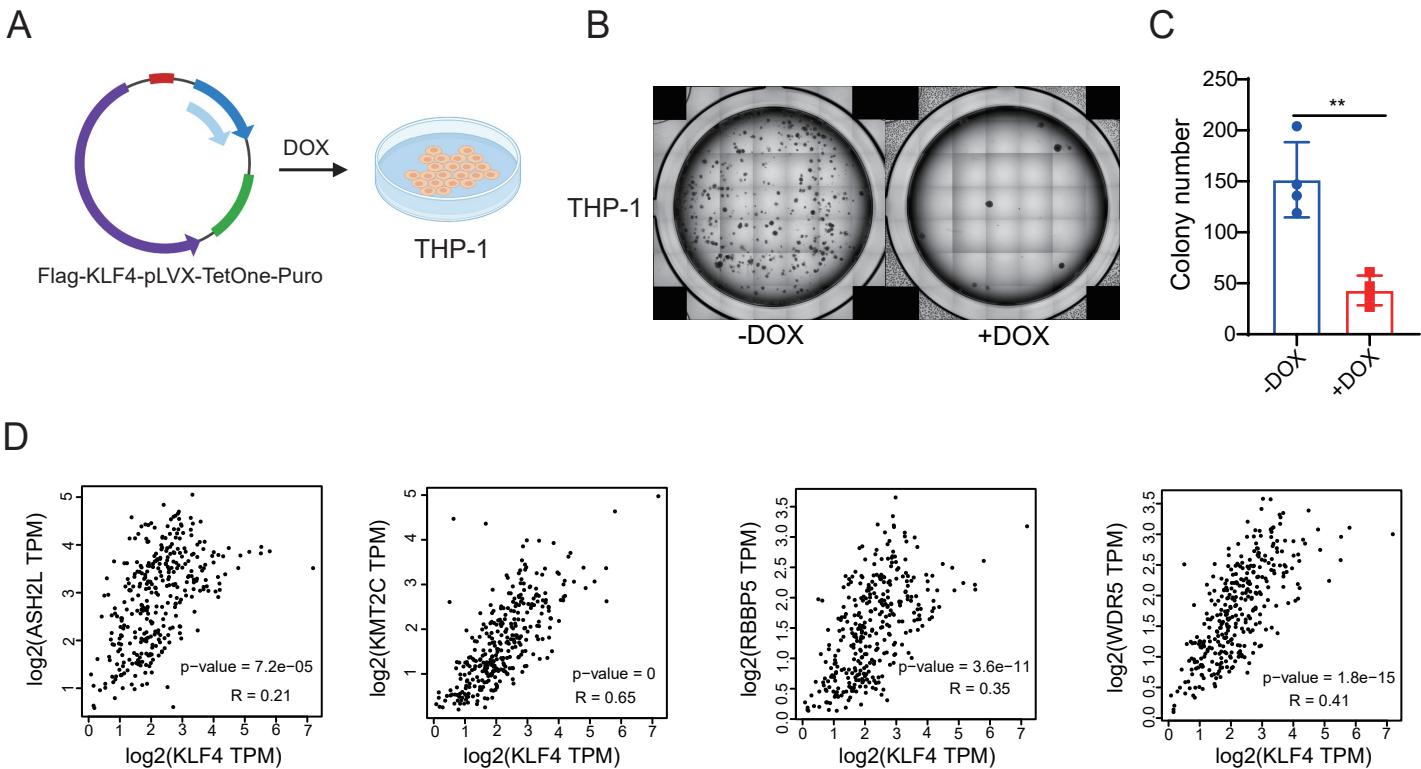

Supplement: Supplementary file 1 [file 11a19930f09b3f60a8355ced.pdf]
